# Supplementary material for: Oligo—Not Only for Silencing: Overlooked Potential for Multidirectional Action in Plants
Source: MDPI journal article supplement (doi:10.3390/ijms24054466), 2023-02-24
Supplement: s1 [file s1]

Fold of L usitatissimum v1 0|Lus10031622 at 37 C.

$\delta G$  in Plot File = 12.0 kcal/mol

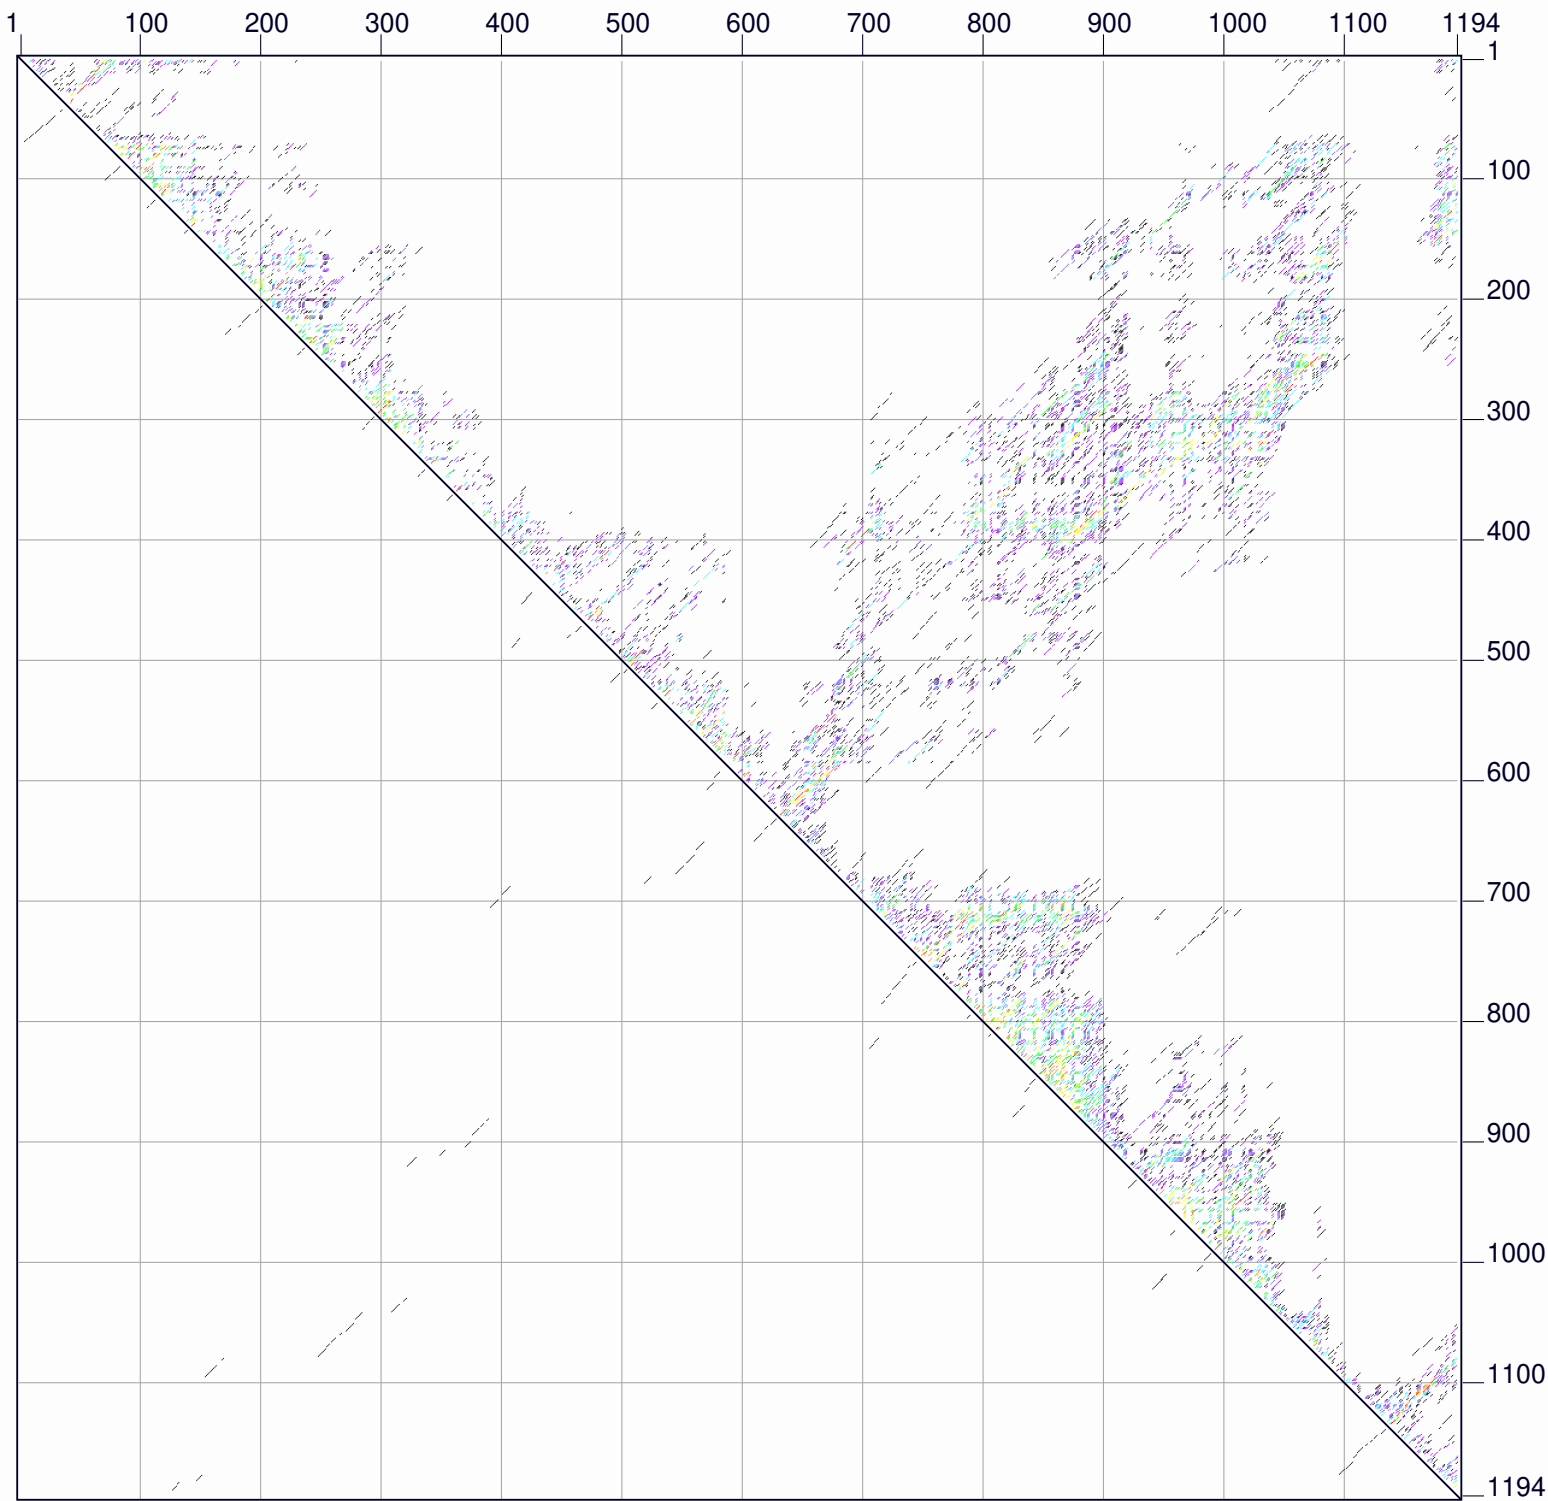

Lower Triangle: Optimal Energy  
Upper Triangle Base Pairs Plotted: 28561

- Optimal Energy = -371.0 kcal/mol
- 371.0 < Energy <= -369.3 kcal/mol
- 369.3 < Energy <= -367.6 kcal/mol
- 367.6 < Energy <= -365.9 kcal/mol
- 365.9 < Energy <= -364.1 kcal/mol
- 364.1 < Energy <= -362.4 kcal/mol
- 362.4 < Energy <= -360.7 kcal/mol
- 360.7 < Energy <= -359.0 kcal/mol
