# Supplementary figures and images for: Oligo—Not Only for Silencing: Overlooked Potential for Multidirectional Action in Plants
Source: MDPI journal article supplement (doi:10.3390/ijms24054466), 2023-02-24

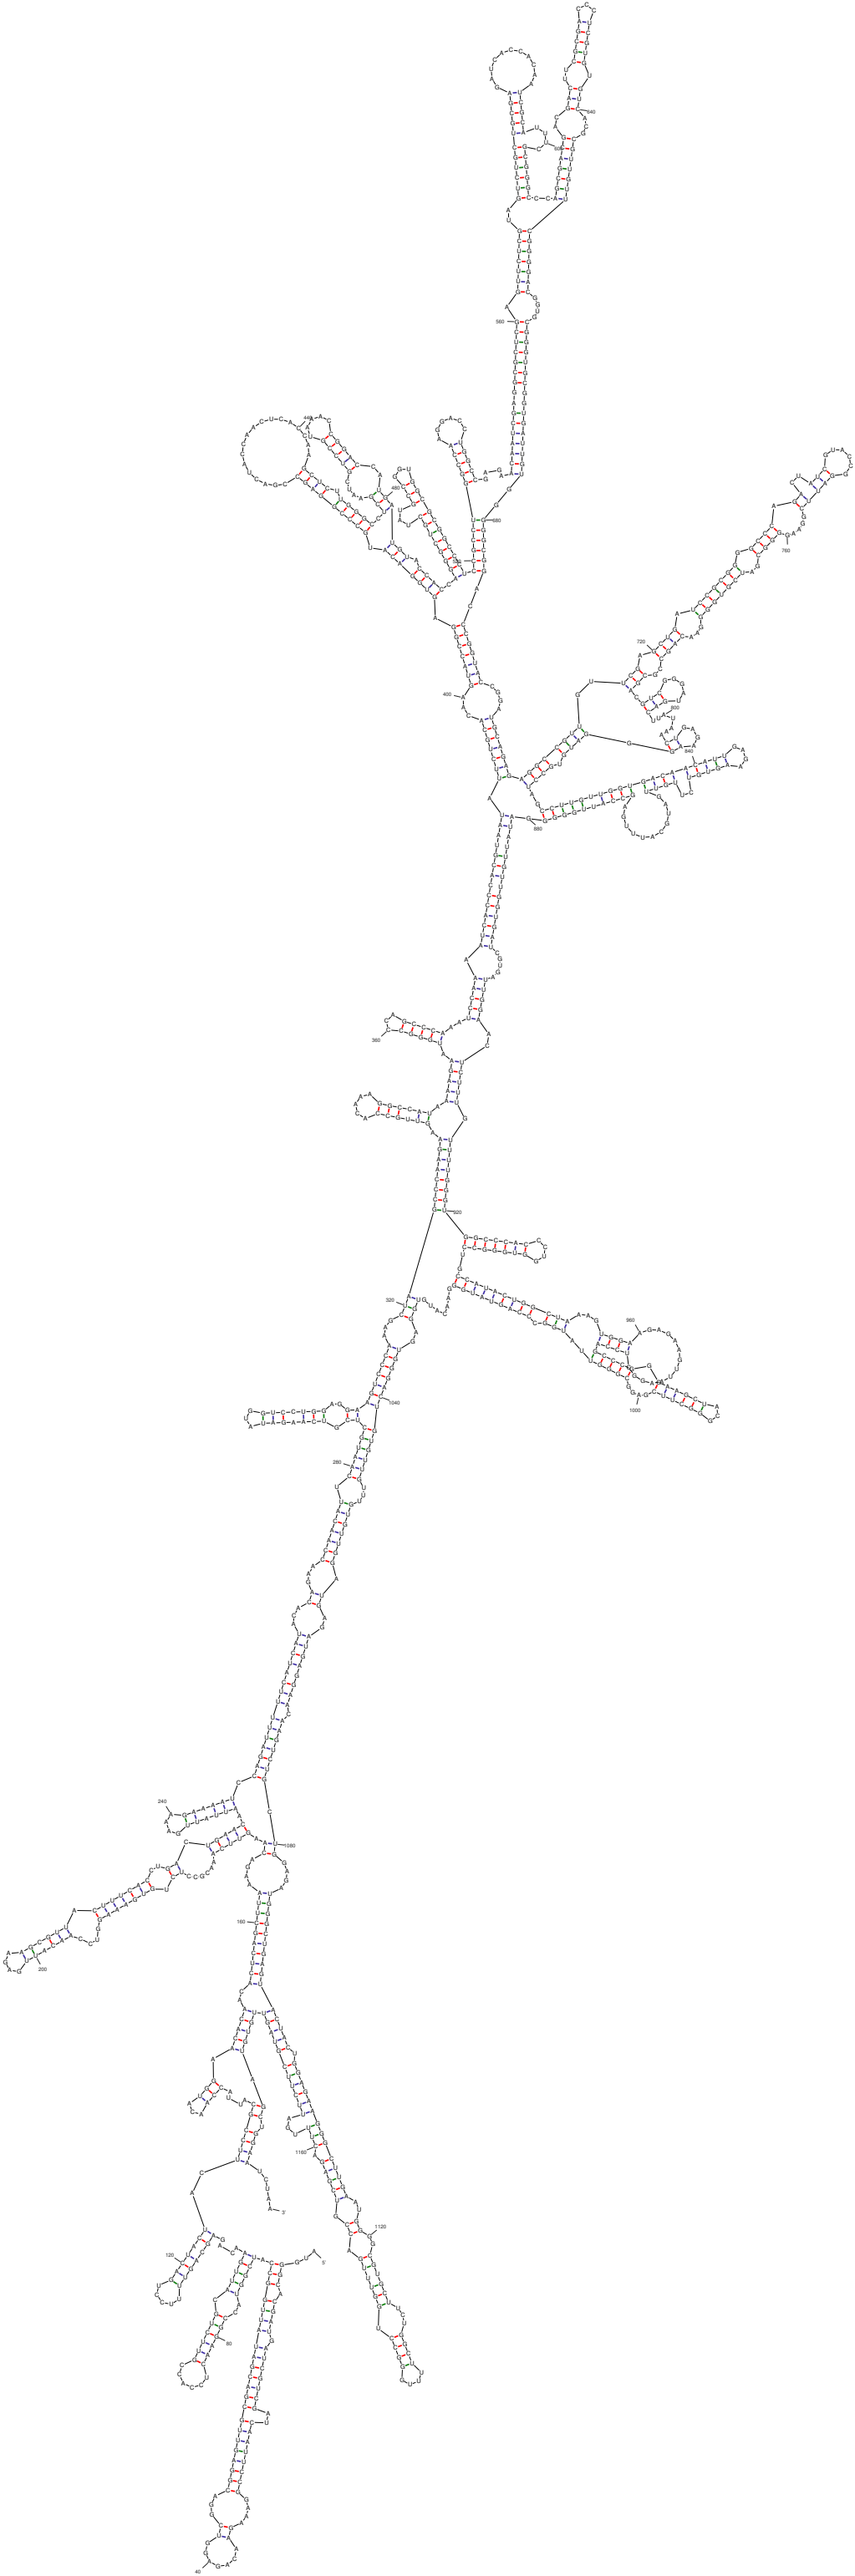

$dG = -371.00$  *L. usitatissimum* v1 0|Lus10031622

Supplement: s1 [file s1]

Probability Profile of Target RNA (from position 1 to 1194)

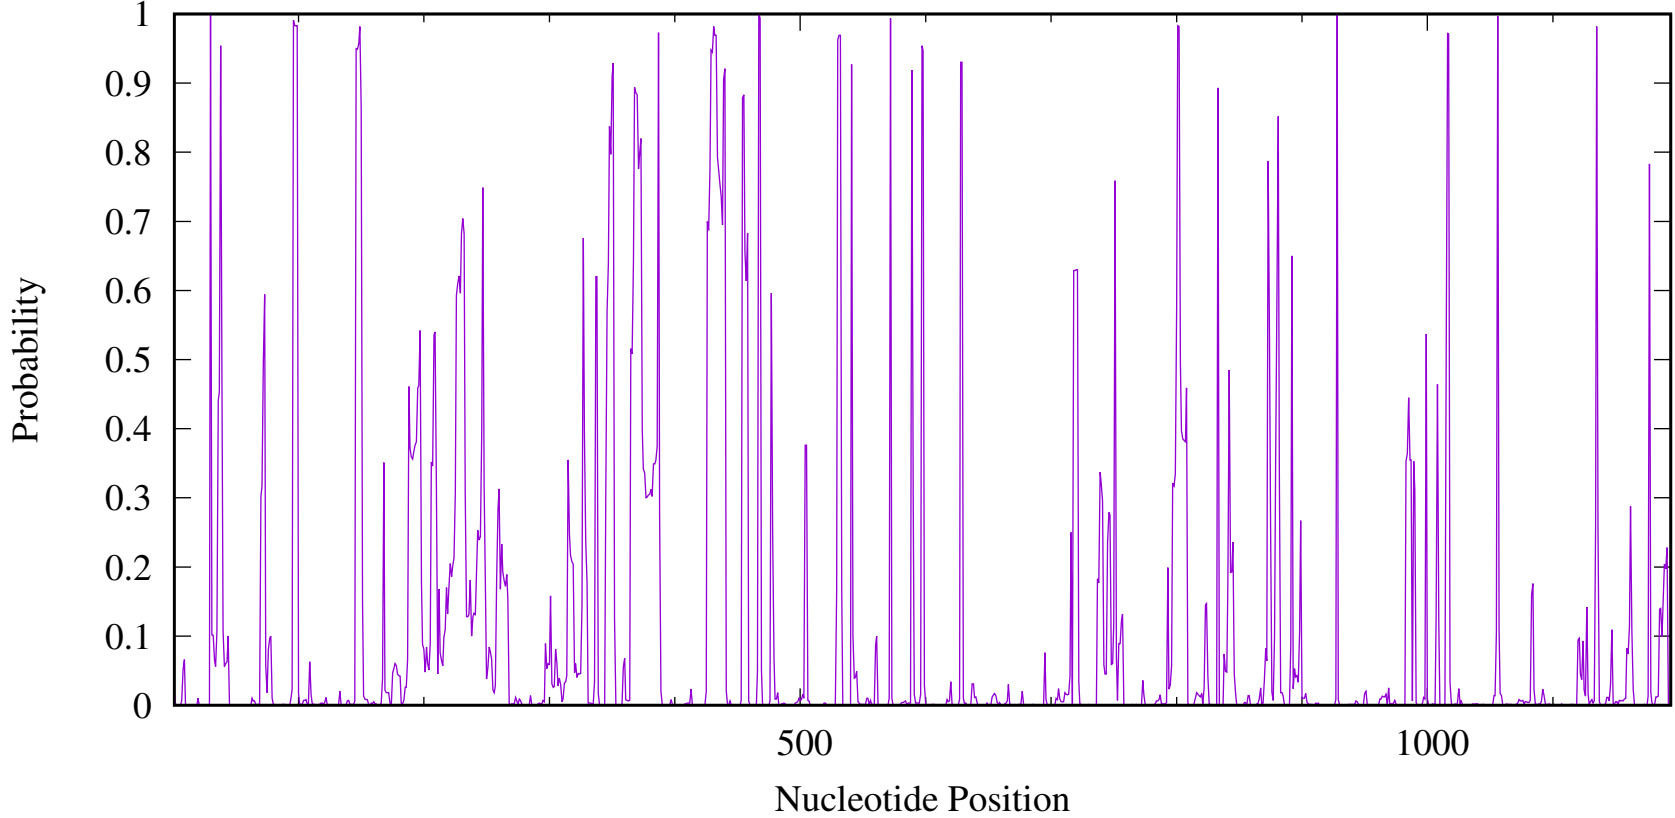

Supplement: s1 [file s1]
